# Supplementary material
Source: ML conference proceedings conference paper supplement (https://proceedings.mlr.press/v189/li23a.html)
Supplement: Supplementary file [file li23a-supp.pdf]

# Contrastive Inductive Bias Controlling Networks for Reinforcement Learning

**Dongxu Li**  
**Shaochen Wang**  
**Kang Chen**  
**Bin Li**

*University of Science and Technology of China*

LIDONGXU6C@MAIL.USTC.EDU.CN

SAMWANG@MAIL.USTC.EDU.CN

CK6@MAIL.USTC.EDU.CN

BINLI@MAIL.USTC.CN

## Appendix A. Hyperparameters

The full list of hyper-parameters is presented in Table 1.

| Parameters               | Settings  |
|--------------------------|-----------|
| Replay buffer capacity   | $10^6$    |
| Action repeat            | 2         |
| Initial steps            | 1000      |
| Stacked frames           | 3         |
| Encoder learning rate    | $1e^{-4}$ |
| Actor learning rate      | $1e^{-3}$ |
| Critic learning rate     | $1e^{-3}$ |
| Batch size               | 128       |
| Discount $\gamma$        | 0.99      |
| Optimizer                | Adam      |
| Transfer update interval | 100       |
| Encoder update intervals | 100       |

Table 1: Default set of hyper-parameters used in our experiments

## Appendix B. PlaNet benchmark

Scores achieved by Our methods (mean standard deviation for 10 seeds) and baselines on DMControl500k and 1DMControl100k. Our method achieves state-of-the-art performance on the majority (8 out of 12) environments benchmarked on DMControl500k. The baselines are DrQ, CURL, PlaNet, Dreamer, SAC+AE, SLAC, and state-based SAC.

| 500k step scores  | DrQ            | CURL    | PlaNet  | SAC-AE  | SLAC          | Ours           | SAC State |
|-------------------|----------------|---------|---------|---------|---------------|----------------|-----------|
| Finger Spin       | <b>938±103</b> | 874±151 | 718±40  | 914±107 | 771±203       | 638±42         | 927±43    |
| Cartpole Swingup  | 868±10         | 861±30  | 787±46  | 730±152 | -             | <b>868±5</b>   | 870±7     |
| Reacher Easy      | 942±71         | 904±94  | 588±471 | 601±135 | -             | <b>965±30</b>  | 975±5     |
| Cheetah Run       | <b>660±96</b>  | 500±91  | 568±21  | 544±50  | 629±74        | 535±98         | 772±60    |
| Walker Walk       | <b>921±45</b>  | 906±56  | 478±164 | 858±82  | 865±97        | 853±48         | 964±8     |
| Ball In Cup Catch | 963±9          | 958±13  | 939±43  | 810±121 | 959±4         | <b>970±7</b>   | 979±6     |
| 100k step scores  |                |         |         |         |               |                |           |
| Finger Spin       | <b>901±104</b> | 779±108 | 560±77  | 747±130 | 680±130       | 582±102        | 672±76    |
| Cartpole Swingup  | 759±92         | 592±170 | 563±73  | 276±38  | -             | <b>838±53</b>  | 812±45    |
| Reacher Easy      | 601±213        | 517±113 | 82±174  | 225±164 | -             | <b>625±230</b> | 919±123   |
| Cheetah Run       | 344±67         | 307±48  | 165±123 | 252±173 | <b>391±47</b> | 170±98         | 228±95    |
| Walker Walk       | 402±164        | 344±132 | 221±43  | 395±58  | 428±74        | <b>605±121</b> | 604±317   |
| Ball In Cup Catch | 780±53         | 772±241 | 710±217 | 338±196 | 607±173       | <b>888±58</b>  | 957±26    |

Figure 1: The PlaNet benchmark
